# Supplementary material for: Profound reduction of HIV-1 reservoir cells over 3 decades of antiretroviral therapy started in early infancy
Source: JCI journal article supplement (doi:10.1172/jci.insight.186550), 2024-11-14

## Supplemental Figure and Table Legends

**Supplemental Table 1:** CD4/CD8 T cell ratios for study participants P1042 and P1043.

**Supplemental Table 2:** Summary of intact and defective HIV-1 sequences isolated from study participants P1042 and P1043 at indicated timepoints.

**Supplemental Table 3:** Clinical and demographic data of comparison cohorts of ART-treated adults (ART, median duration of ART of 12.84 years) and elite controllers (EC).

**Supplemental Figure 1.** Longitudinal HIV-1 plasma viral loads and proportions of CD4 T cells in P-1042 and P-1043. Antiretroviral treatment exposure is indicated on x-axis. Diamonds: proportions of CD4 T cells (%); Closed circles: RNA Viral load > LOD; Open circles: RNA Viral load < LOD; Red arrow: Single RNA Viral load > LOD in P-1043 after suppression. Vertical shading indicates timepoints at which samples were analyzed. ZDV, zidovudine; ddl, didanosine; NVP nevirapine; d4T, stavudine; 3TC, lamivudine; TDF, tenofovir disoproxil fumarate; FTC, emtricitabine; ABC, abacavir; ATV/r = Ritonavir-boosted Atazanavir; DTG, dolutegravir

**Supplemental Figure 2.** Gating scheme for T cell proliferation experiments. Representative counter plots from the negative control condition from representative HIV-negative donor are shown.

Supplemental Table 1

| P1042       |      |      |               |
|-------------|------|------|---------------|
| Age (years) | CD4% | CD8% | CD4/CD8 ratio |
| 0.6         | 60   | 19   | 3.2           |
| 12          | 45   | 18   | 2.5           |
| 20          | 51   | 21   | 2.4           |
| 28          | 54   | 15   | 3.6           |
| P1043       |      |      |               |
| Age (years) | CD4% | CD8% | CD4/CD8 ratio |
| 0.6         | 60   | 17   | 3.5           |
| 12          | 52   | 21   | 2.5           |
| 20          | 54   | 22   | 2.5           |
| 28          | 57   | 22   | 2.6           |

Supplemental Table 2

| P1042<br>HLA-A*26:08, HLA-A*30:02, HLA-B*18:01, HLA-B*39:01, HLA-C*05:01, HLA-C*12:03 |                              |                            |                              |                            |                              |                            |                                                      |                            |
|---------------------------------------------------------------------------------------|------------------------------|----------------------------|------------------------------|----------------------------|------------------------------|----------------------------|------------------------------------------------------|----------------------------|
| Timepoint                                                                             | 0.6 years                    |                            | 12 years                     |                            | 20 years                     |                            | 28 years                                             |                            |
| Total Cells Assayed<br>(in millions of PBMCs/CD4 T cells)                             | 5.07                         |                            | 8.37                         |                            | 9.57                         |                            | 1,049<br>(976 million PBMC, 73 million CD4 T cells)  |                            |
|                                                                                       | Absolute number of sequences | Sequences per million PBMC | Absolute number of sequences | Sequences per million PBMC | Absolute number of sequences | Sequences per million PBMC | Absolute number of sequences                         | Sequences per million PBMC |
| Intact sequences                                                                      | 11                           | 2.17                       | 0                            | 0.00                       | 1                            | 0.10                       | 0                                                    | 0.00                       |
| 5' Defect sequences                                                                   | 5                            | 0.99                       | 2                            | 0.24                       | 0                            | 0.00                       | 0                                                    | 0.00                       |
| Hypermutated sequences                                                                | 11                           | 2.17                       | 7                            | 0.84                       | 4                            | 0.42                       | 10                                                   | 9.53 x 10 <sup>-4</sup>    |
| Sequences with a premature stop codon                                                 | 0                            | 0.00                       | 0                            | 0.00                       | 0                            | 0.00                       | 1                                                    | 9.53 x 10 <sup>-4</sup>    |
| Sequences with internal inversion                                                     | 1                            | 0.20                       | 0                            | 0.00                       | 0                            | 0.00                       | 16                                                   | 1.53 x 10 <sup>-2</sup>    |
| Sequences with large deletions                                                        | 111                          | 21.89                      | 40                           | 4.78                       | 34                           | 3.55                       | 371                                                  | 0.35                       |
| Total defective sequences                                                             | 128                          | 25.24                      | 49                           | 5.62                       | 38                           | 3.97                       | 398                                                  | 0.38                       |
| P1043<br>HLA-A*11:01, HLA-A*26:08, HLA-B*39:01, HLA-B*51:01, HLA-C*05:03, HLA-C*12:03 |                              |                            |                              |                            |                              |                            |                                                      |                            |
| Timepoint                                                                             | 0.6 years                    |                            | 12 years                     |                            | 20 years                     |                            | 28 years                                             |                            |
| Total Cells Assayed<br>(in millions of PBMCs/CD4 T cells)                             | 4.04                         |                            | 7.31                         |                            | 8.71                         |                            | 1,142<br>(1080 million PBMC, 62 million CD4 T cells) |                            |
|                                                                                       | Absolute number of sequences | Sequences per million PBMC | Absolute number of sequences | Sequences per million PBMC | Absolute number of sequences | Sequences per million PBMC | Absolute number of sequences                         | Sequences per million PBMC |
| Intact sequences                                                                      | 48                           | 11.90                      | 9                            | 1.23                       | 0                            | 0.10                       | 1                                                    | 8.73 x 10 <sup>-4</sup>    |
| 5' Defect sequences                                                                   | 1                            | 0.25                       | 0                            | 0.00                       | 0                            | 0.00                       | 0                                                    | 0.00                       |
| Hypermutated sequences                                                                | 26                           | 6.44                       | 2                            | 0.27                       | 2                            | 0.23                       | 5                                                    | 4.36 x 10 <sup>-3</sup>    |
| Sequences with a premature stop codon                                                 | 9                            | 2.23                       | 0                            | 0.00                       | 0                            | 0.00                       | 1                                                    | 8.73 x 10 <sup>-4</sup>    |
| Sequences with internal inversion                                                     | 1                            | 0.35                       | 0                            | 0.00                       | 0                            | 0.00                       | 2                                                    | 1.75x 10 <sup>-3</sup>     |
| Sequences with large deletions                                                        | 70                           | 17.35                      | 9                            | 1.23                       | 8                            | 0.92                       | 303                                                  | 0.26                       |
| Total defective sequences                                                             | 107                          | 26.52                      | 11                           | 1.50                       | 10                           | 1.15                       | 311                                                  | 0.27                       |

Supplemental Table 3

| Cohort | Number of Participants | % Male | % Female | Age (years) | CD4 Count/ul (median, range) | Recorded duration of undetectable viremia in years (median, range) | Duration of ART (median, range) |
|--------|------------------------|--------|----------|-------------|------------------------------|--------------------------------------------------------------------|---------------------------------|
| EC     | 72                     | 81.9   | 18.1     | 57 (31-75)  | 882 (450, 2282)              | 8.8 (1, 24.2)                                                      | N/A                             |
| ART    | 43                     | 69.8   | 30.2     | 55 (34, 73) | 727 (316, 1657)              | 8 (1, 19)                                                          | 12.84 (1.3, 21.3)               |

Supplemental Figure 1

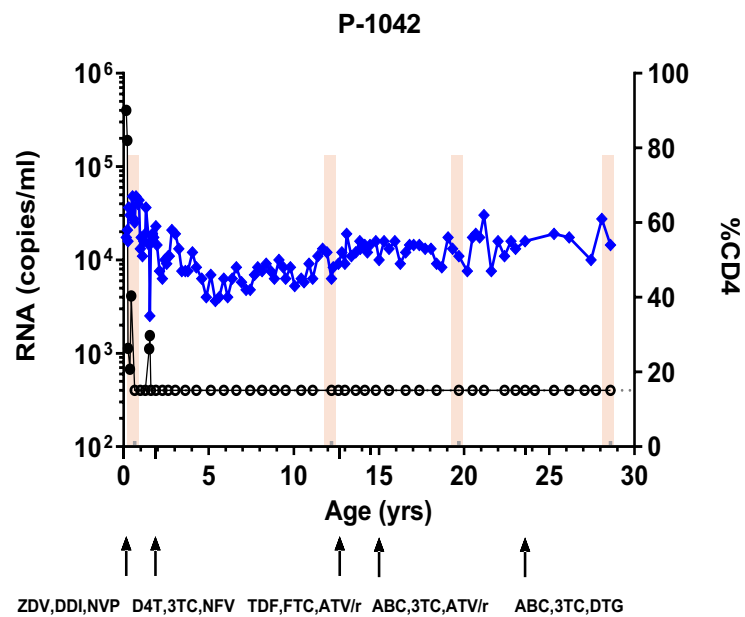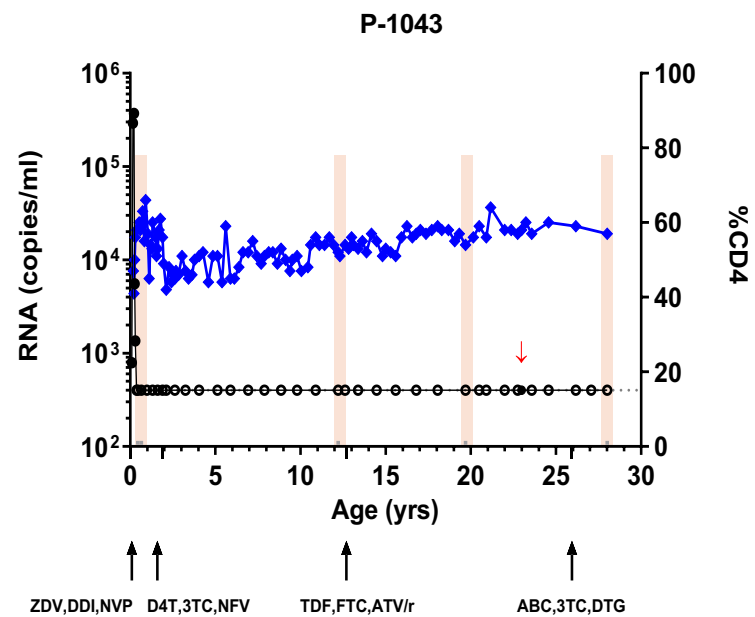

Supplemental Figure 2

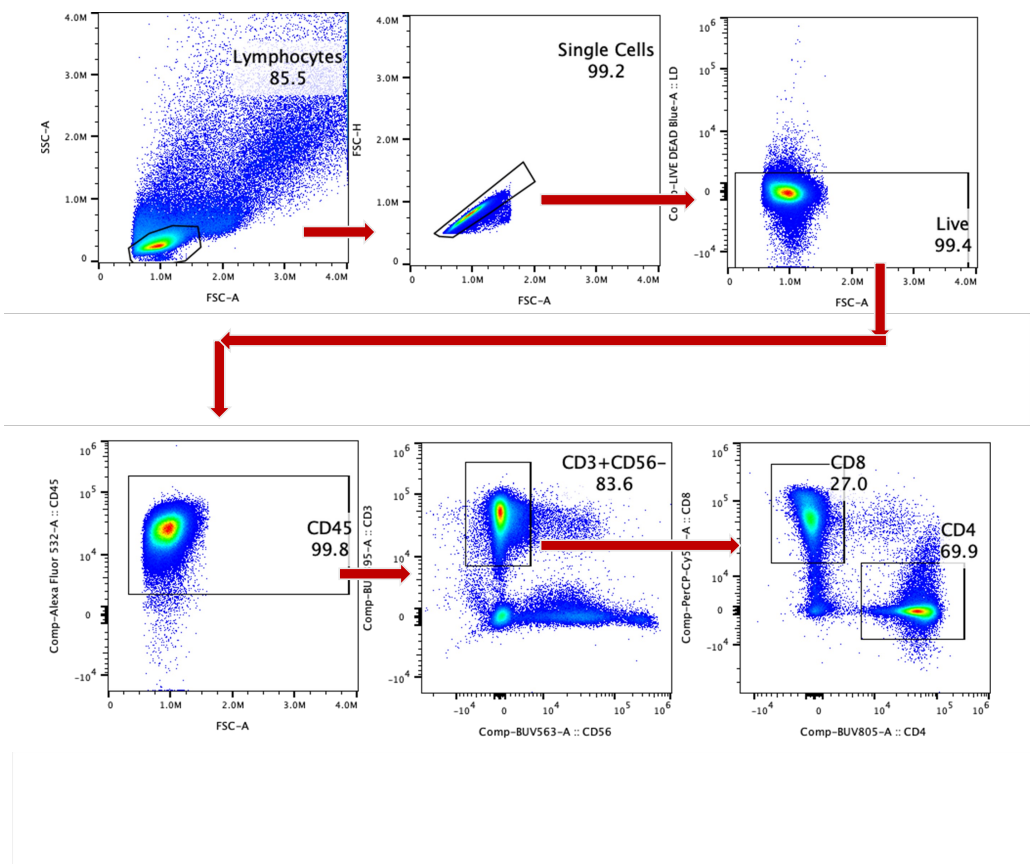

Supplement: sd1 [file 1]
